# Supplementary material for: The association of telomere length with substance use disorders: systematic review and meta-analysis protocol
Source: Springer Nature journal article supplement (doi:10.1186/s13643-019-1199-x), 2019-12-01

Additional file 2: Search Strategy

|                                                                                                                                                                                                                                                                                                                                                                                                                                                                                                                                                                                                                                                                                                                                                                                                                                                                                                                                                                              |
|------------------------------------------------------------------------------------------------------------------------------------------------------------------------------------------------------------------------------------------------------------------------------------------------------------------------------------------------------------------------------------------------------------------------------------------------------------------------------------------------------------------------------------------------------------------------------------------------------------------------------------------------------------------------------------------------------------------------------------------------------------------------------------------------------------------------------------------------------------------------------------------------------------------------------------------------------------------------------|
| <b>PUBMED</b>                                                                                                                                                                                                                                                                                                                                                                                                                                                                                                                                                                                                                                                                                                                                                                                                                                                                                                                                                                |
| ((("drug abuse" OR "drug addiction" OR "drug dependence" OR "drug use disorder" OR "drug habituation" OR "substance abuse" OR "substance addiction" OR "substance dependence" OR (drug*[tiab] AND abuse[tiab]) OR (drug*[tiab] AND addiction[tiab]) OR (drug*[tiab] AND dependence[tiab]) OR (drug*[tiab] AND habituation[tiab]) OR (substance[tiab] AND abuse[tiab]) OR (substance[tiab] AND addiction[tiab]) OR (substance[tiab] AND dependence[tiab]) OR "Substance-Related Disorders"[Mesh] OR alcohol* OR heroin OR cocaine OR cannabi* OR marijuana OR opium OR *amphetamine OR amphetamine* OR morphine OR LSD OR "Lysergic Acid Diethylamide" OR opio* OR "street drugs"[MeSH] OR "Psychotropic Drugs"[MeSH] OR "Designer Drugs"[MeSH]))<br><br>AND<br>("Telomere Shortening"[Mesh] OR "telomere length" OR "Telomere Shortening"[tiab] OR "Telomere"[Mesh])                                                                                                         |
| <b>PsychINFO-Psychlit</b>                                                                                                                                                                                                                                                                                                                                                                                                                                                                                                                                                                                                                                                                                                                                                                                                                                                                                                                                                    |
| (DE "Drug Abuse" OR DE "Drug Addiction" OR DE "Drug Dependency" OR DE "Substance Abuse and Addiction Measures" OR DE "Substance Use Disorder" OR "drug abuse" OR "drug addiction" OR "drug dependence" OR "drug use disorder" OR "drug habituation"<br><br>OR "substance abuse" OR "substance addiction" OR "substance dependence"<br><br>OR ((TI drug* OR TI substance*) AND (TI abuse OR TI addiction OR TI dependenc* OR TI habituation))<br><br>OR ((AB drug* OR AB substance*) AND (AB abuse OR AB addiction OR AB dependenc* OR AB habituation))<br><br>OR MA "Substance-Related Disorders" OR MA "street drugs" OR "street drugs"[MeSH] OR MA "Psychotropic Drugs" OR "Psychotropic Drugs"[MeSH] OR MA "Designer Drugs" OR "Designer Drugs"[MeSH] OR alcohol* OR heroin OR cocaine OR cannabi* OR marijuana<br><br>OR opium OR *amphetamine OR methamphetamine* OR amphetamine* OR morphine OR opio* OR "Lysergic Acid Diethylamide" OR "LSD")<br><br>AND<br>telomer* |
| <b>EMBASE</b>                                                                                                                                                                                                                                                                                                                                                                                                                                                                                                                                                                                                                                                                                                                                                                                                                                                                                                                                                                |
| ('drug abuse' OR 'drug addiction' OR 'drug dependence'/exp OR 'drug use disorder' OR 'drug habituation' OR 'substance abuse' OR 'substance addiction' OR 'substance                                                                                                                                                                                                                                                                                                                                                                                                                                                                                                                                                                                                                                                                                                                                                                                                          |

dependence' OR (drug\*:ti,ab AND abuse:ti,ab) OR (drug\*:ti,ab AND addiction:ti,ab)  
OR (drug\*:ti,ab AND dependenc\*:ti,ab) OR (drug\*:ti,ab AND habituation:ti,ab) OR  
(substance:ti,ab AND abuse:ti,ab) OR (substance:ti,ab AND addiction:ti,ab) OR  
(substance:ti,ab AND dependenc\*:ti,ab) OR alcohol\* OR heroin OR cocaine OR  
cannabi\* OR marijuana OR opium OR methamphetamine\* OR amphetamine\* OR  
morphine OR opio\* OR LSD OR 'Lysergic Acid Diethylamide' OR 'street drug'/exp OR  
'designer drug'/exp OR 'illicit drug'/exp OR 'recreational drug'/exp)

AND

('telomere shortening'/exp OR 'telomere length'/exp OR 'telomere shortening':ti,ab OR  
'telomere length':ti,ab OR 'telomere'/exp)

## **WOS**

((((TS=drug\* OR TS=substance\*) AND (TS=abuse OR TS=addiction OR  
TS=dependenc\* OR TS=habituation)) OR TS="street drugs" OR TS="Psychotropic  
Drugs" OR TS="Designer Drugs" OR TS=alcohol\* OR TS=heroin OR TS=cocaine OR  
TS=cannabi\* OR TS=marijuana OR TS=opium OR TS=methamphetamine\* OR  
TS=amphetamine\* OR TS=morphine OR TS=opio\* OR TS=LSD OR TS ="Lysergic  
Acid Diethylamide"))

AND

TS=Telomere\*

**FLOW CHART OF THE PROCESS FOR SEARCHING AND ASSESSING ELIGIBILITY OF STUDIES** (Adapted from Sagoo y cols, PLOSmedicine 2009; 6 (3): e1000028)

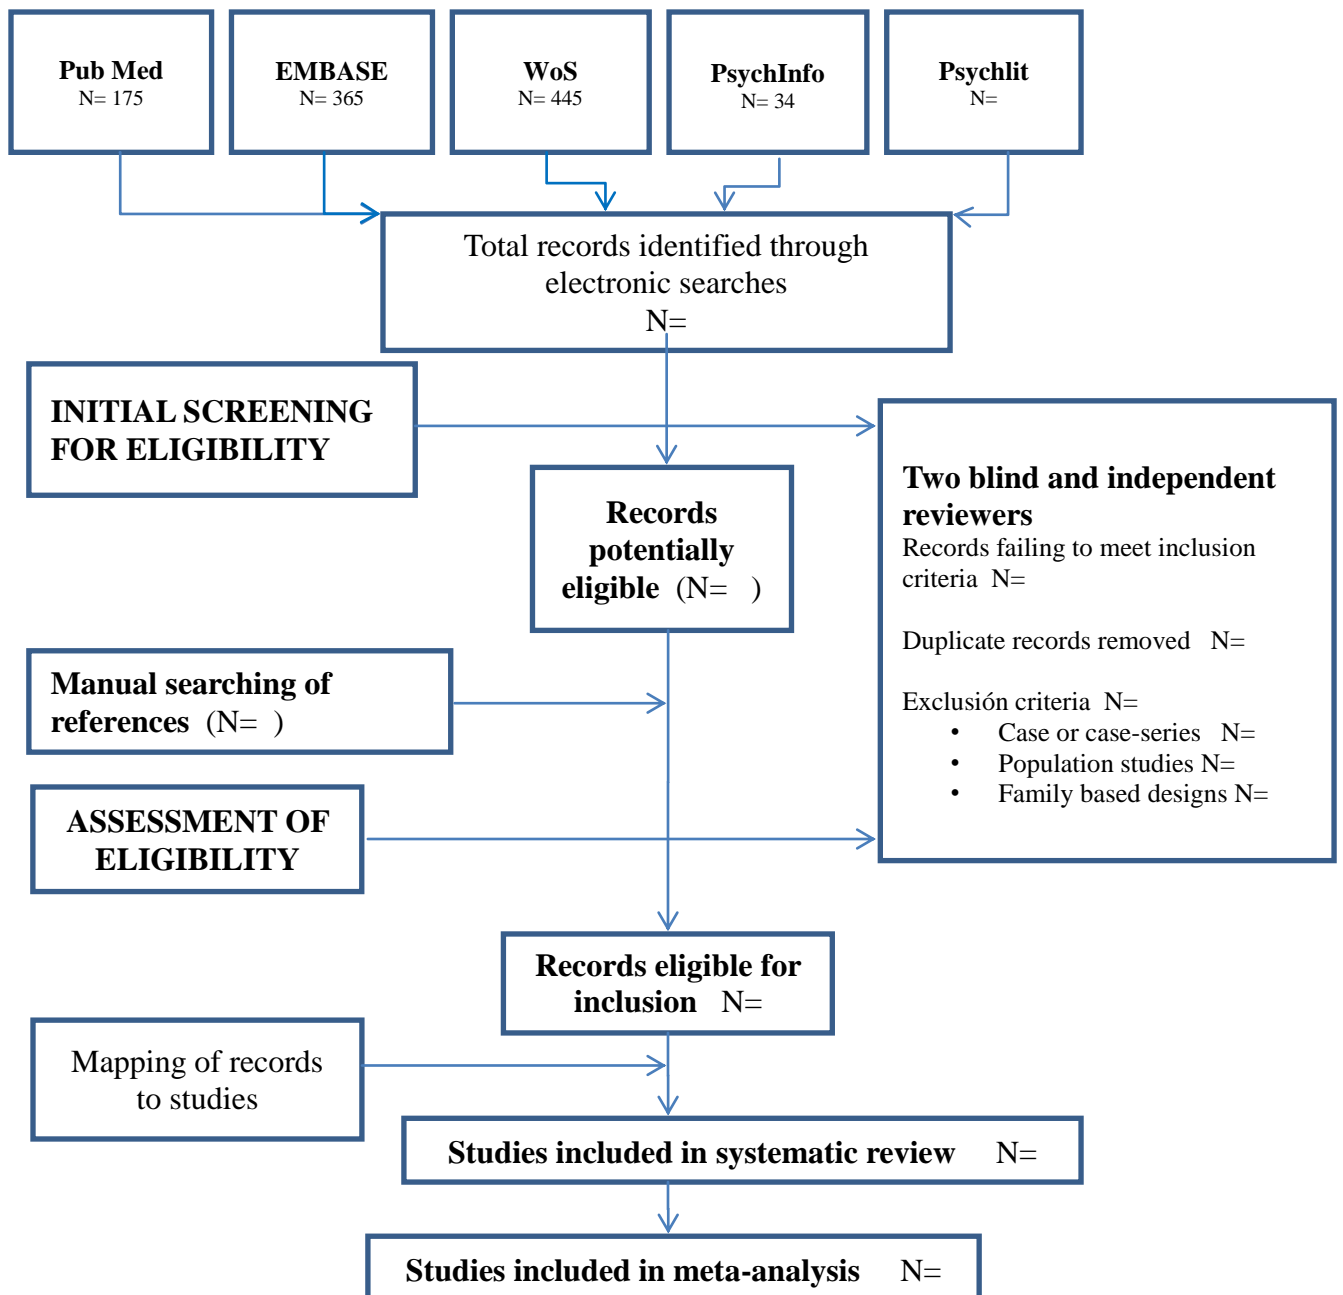

Supplement: MOESM2 [file 17456390]
