# Supplementary material for: The association of telomere length with substance use disorders: systematic review and meta-analysis protocol
Source: Syst Rev. 2019 Dec 1;8:298. doi: 10.1186/s13643-019-1199-x (PMC6886210; doi:10.1186/s13643-019-1199-x)
Supplement: Supplementary file 1 — Additional file 1. Preferred Reporting Items for Systematic Review and Meta-Analysis Protocols (PRISMA-P) 2015 Checklist: recommended items to include in a systematic review protocol. [file 13643_2019_1199_MOESM1_ESM.pdf]

## Additional file 1: PRISMA-P 2015 Checklist

| Section/topic              | #  | Checklist item                                                                                                                                                                                                            | Information reported     |                          | Line number(s) |
|----------------------------|----|---------------------------------------------------------------------------------------------------------------------------------------------------------------------------------------------------------------------------|--------------------------|--------------------------|----------------|
|                            |    |                                                                                                                                                                                                                           | Yes                      | No                       |                |
| ADMINISTRATIVE INFORMATION |    |                                                                                                                                                                                                                           |                          |                          |                |
| Title                      |    |                                                                                                                                                                                                                           |                          |                          |                |
| Identification             | 1a | Identify the report as a protocol of a systematic review                                                                                                                                                                  | X                        | <input type="checkbox"/> | 2-3            |
| Update                     | 1b | If the protocol is for an update of a previous systematic review, identify as such                                                                                                                                        | <input type="checkbox"/> | <input type="checkbox"/> | Not applicable |
| Registration               | 2  | If registered, provide the name of the registry (e.g., PROSPERO) and registration number in the Abstract                                                                                                                  | X                        | <input type="checkbox"/> | 63, 129        |
| Authors                    |    |                                                                                                                                                                                                                           |                          |                          |                |
| Contact                    | 3a | Provide name, institutional affiliation, and e-mail address of all protocol authors; provide physical mailing address of corresponding author                                                                             | X                        | <input type="checkbox"/> | 4-37           |
| Contributions              | 3b | Describe contributions of protocol authors and identify the guarantor of the review                                                                                                                                       | X                        | <input type="checkbox"/> | 251-258        |
| Amendments                 | 4  | If the protocol represents an amendment of a previously completed or published protocol, identify as such and list changes; otherwise, state plan for documenting important protocol amendments                           | X                        | <input type="checkbox"/> | 241-244        |
| Support                    |    |                                                                                                                                                                                                                           |                          |                          |                |
| Sources                    | 5a | Indicate sources of financial or other support for the review                                                                                                                                                             | X                        | <input type="checkbox"/> | 260-264        |
| Sponsor                    | 5b | Provide name for the review funder and/or sponsor                                                                                                                                                                         | X                        | <input type="checkbox"/> | “              |
| Role of sponsor/funder     | 5c | Describe roles of funder(s), sponsor(s), and/or institution(s), if any, in developing the protocol                                                                                                                        | X                        | <input type="checkbox"/> | “              |
| INTRODUCTION               |    |                                                                                                                                                                                                                           |                          |                          |                |
| Rationale                  | 6  | Describe the rationale for the review in the context of what is already known                                                                                                                                             | X                        | <input type="checkbox"/> | 80-116         |
| Objectives                 | 7  | Provide an explicit statement of the question(s) the review will address with reference to participants, interventions, comparators, and outcomes (PICO)                                                                  | X                        | <input type="checkbox"/> | 117-125        |
| METHODS                    |    |                                                                                                                                                                                                                           |                          |                          |                |
| Eligibility criteria       | 8  | Specify the study characteristics (e.g., PICO, study design, setting, time frame) and report characteristics (e.g., years considered, language, publication status) to be used as criteria for eligibility for the review | X                        | <input type="checkbox"/> | 141-154        |
| Information sources        | 9  | Describe all intended information sources (e.g., electronic databases, contact with study authors, trial registers, or other grey literature sources) with planned dates of coverage                                      | X                        | <input type="checkbox"/> | 131-133        |
| Search strategy            | 10 | Present draft of search strategy to be used for at least one electronic database, including planned limits, such that it could be repeated                                                                                | X                        | <input type="checkbox"/> | 133-140        |
| STUDY RECORDS              |    |                                                                                                                                                                                                                           |                          |                          |                |

| Section/topic                      | #   | Checklist item                                                                                                                                                                                                                              | Information reported |                          | Line number(s)   |
|------------------------------------|-----|---------------------------------------------------------------------------------------------------------------------------------------------------------------------------------------------------------------------------------------------|----------------------|--------------------------|------------------|
|                                    |     |                                                                                                                                                                                                                                             | Yes                  | No                       |                  |
| Data management                    | 11a | Describe the mechanism(s) that will be used to manage records and data throughout the review                                                                                                                                                | X                    | <input type="checkbox"/> | 156-157          |
| Selection process                  | 11b | State the process that will be used for selecting studies (e.g., two independent reviewers) through each phase of the review (i.e., screening, eligibility, and inclusion in meta-analysis)                                                 | X                    | <input type="checkbox"/> | 157-164          |
| Data collection process            | 11c | Describe planned method of extracting data from reports (e.g., piloting forms, done independently, in duplicate), any processes for obtaining and confirming data from investigators                                                        | X                    | <input type="checkbox"/> | 157-164, 174-180 |
| Data items                         | 12  | List and define all variables for which data will be sought (e.g., PICO items, funding sources), any pre-planned data assumptions and simplifications                                                                                       | X                    | <input type="checkbox"/> | 161-173          |
| Outcomes and prioritization        | 13  | List and define all outcomes for which data will be sought, including prioritization of main and additional outcomes, with rationale                                                                                                        | X                    | <input type="checkbox"/> | 146-152          |
| Risk of bias in individual studies | 14  | Describe anticipated methods for assessing risk of bias of individual studies, including whether this will be done at the outcome or study level, or both; state how this information will be used in data synthesis                        | X                    | <input type="checkbox"/> | 181-186          |
| <b>DATA</b>                        |     |                                                                                                                                                                                                                                             |                      |                          |                  |
| Synthesis                          | 15a | Describe criteria under which study data will be quantitatively synthesized                                                                                                                                                                 | X                    | <input type="checkbox"/> | 190-227          |
|                                    | 15b | If data are appropriate for quantitative synthesis, describe planned summary measures, methods of handling data, and methods of combining data from studies, including any planned exploration of consistency (e.g., $I^2$ , Kendall's tau) | X                    | <input type="checkbox"/> | 190-227          |
|                                    | 15c | Describe any proposed additional analyses (e.g., sensitivity or subgroup analyses, meta-regression)                                                                                                                                         | X                    | <input type="checkbox"/> | 220-232          |
|                                    | 15d | If quantitative synthesis is not appropriate, describe the type of summary planned                                                                                                                                                          | X                    | <input type="checkbox"/> | 232-233          |
| Meta-bias(es)                      | 16  | Specify any planned assessment of meta-bias(es) (e.g., publication bias across studies, selective reporting within studies)                                                                                                                 | X                    | <input type="checkbox"/> | 228-230          |
| Confidence in cumulative evidence  | 17  | Describe how the strength of the body of evidence will be assessed (e.g., GRADE)                                                                                                                                                            | X                    | <input type="checkbox"/> | 233-235          |
